# Supplementary material for: Whole rumen metagenome sequencing allows classifying and predicting feed efficiency and intake levels in cattle
Source: PubMed Central journal article supplement (PMC6327033; doi:10.1038/s41598-018-36673-w), 2019-01-09

## **Whole rumen metagenome sequencing allows classifying and predicting feed efficiency and intake levels in cattle**

**Beatriz Delgado<sup>1</sup>, Alex Bach<sup>2,3</sup>, Isabel Guasch<sup>4</sup>, Carmen González<sup>5</sup>, Guillermo Elcoso<sup>4</sup>, Jennie E. Pryce<sup>6</sup>, Oscar Gonzalez-Recio<sup>1,5</sup>**

<sup>1</sup>Escuela Técnica Superior de Ingeniería Agronómica, Alimentaria y de Biosistemas. UPM. Ciudad Universitaria s/n 28040 Madrid, Spain

<sup>2</sup>Institució Catalana de Recerca i Estudis Avançants, ICREA, 08007 Barcelona, Spain.

<sup>3</sup>Department of Ruminant Production, IRTA, 08140 Caldes de Montbui, Spain.

<sup>4</sup>Blanca from the Pyrenees, 25795 Hostalets the Tost, Spain

<sup>5</sup>Departamento de Mejora Genética Animal. Instituto Nacional de Investigación y Tecnología Agraria y Alimentaria O.A., M.P. 28040 Madrid, Spain

<sup>6</sup>Bioscience Research Division, ECODEV, Bundoora 3038, Australia

**Supplementary Table T1. *Diet.*** Diet composition fed to BLANCA cows.

| <b>Item</b>                         | <b>Amount</b> |
|-------------------------------------|---------------|
| <b>Ingredient, % od DM</b>          |               |
| Fescue hay                          | 22.46         |
| Corn grain                          | 20.55         |
| Barley grain                        | 19.15         |
| Wheat silage                        | 9.26          |
| Soybean meal                        | 8.85          |
| Sunflower meal                      | 4.26          |
| Grass silage                        | 3.31          |
| Straw                               | 3.27          |
| Soybean hulls                       | 2.90          |
| Alfalfa hay                         | 1.59          |
| Molasses                            | 1.50          |
| Wheat middlings                     | 0.73          |
| Ryegrass hay                        | 0.64          |
| Calcium carbonate                   | 0.50          |
| Beet pulp                           | 0.45          |
| Sodium chloride                     | 0.27          |
| Magnesium oxide                     | 0.18          |
| Mineral vitamin premix              | 0.14          |
| <b>Nutrient, DM basis</b>           |               |
| Crude protein, %                    | 15.3          |
| Neutral detergent fiber, %          | 34.9          |
| Fat, %                              | 2.45          |
| Ash, %                              | 5.66          |
| Net energy of lactation,<br>Mcal/kg | 1.64          |

**Supplementary Table T2. Summary of reads resulted from the metagenome sequencing of each sample. Number of forward (R1) and reverse (R2) reads of each sample with their average length and corresponding standard deviation (SD).**

| sample | R1reads | R1LenMean | R1LenSd | R2reads | R2LenMean | R2LenSd |
|--------|---------|-----------|---------|---------|-----------|---------|
| S1     | 1211800 | 273.75    | 50.35   | 1211800 | 282.49    | 47.71   |
| S2     | 1046062 | 278.98    | 44.87   | 1046062 | 287.24    | 41.02   |
| S3     | 702149  | 279.99    | 46.36   | 702149  | 285.54    | 44.3    |
| S4     | 1398741 | 282.96    | 43.98   | 1398741 | 288.21    | 41.27   |
| S5     | 919530  | 286.24    | 39.63   | 919530  | 290.59    | 36.85   |
| S6     | 1845909 | 270.82    | 57.54   | 1845909 | 278.49    | 55.84   |
| S7     | 742156  | 250.29    | 65.16   | 742156  | 265.32    | 65.56   |
| S8     | 1239730 | 276.48    | 46.72   | 1239730 | 286.05    | 42.6    |
| S9     | 1024800 | 284.59    | 40.77   | 1024800 | 289.84    | 37.73   |
| S10    | 1149620 | 280.6     | 43.83   | 1149620 | 287.61    | 40.52   |
| S11    | 957466  | 277.11    | 28.65   | 957362  | 284.31    | 23.84   |
| S12    | 848155  | 270.47    | 53.76   | 848155  | 279.52    | 51.76   |
| S13    | 1165212 | 262.11    | 57.41   | 1165212 | 272.83    | 56.55   |
| S14    | 679854  | 275.3     | 52.51   | 679854  | 282.48    | 50.2    |
| S15    | 990621  | 275.04    | 49.18   | 990621  | 283.95    | 46.05   |
| S16    | 887753  | 284.42    | 40.95   | 887753  | 289.55    | 38.06   |
| S17    | 895359  | 276.49    | 51.96   | 895359  | 282.62    | 49.98   |
| S18    | 1185485 | 274.22    | 50.64   | 1185485 | 283.39    | 47.5    |
| S19    | 710081  | 283.08    | 41.85   | 710081  | 288.73    | 38.92   |
| S20    | 1140761 | 275.08    | 49.05   | 1140761 | 283.04    | 46.62   |
| S21    | 974114  | 279.88    | 47.93   | 974114  | 285.45    | 45.77   |
| S22    | 795061  | 274.81    | 49.09   | 795061  | 282.78    | 46.79   |
| S23    | 1128868 | 282.77    | 43.08   | 1128868 | 288.82    | 39.73   |
| S24    | 1190329 | 278.78    | 50.85   | 1190329 | 284.26    | 48.8    |
| S25    | 931155  | 286.68    | 38.2    | 931155  | 291.23    | 35.14   |
| S26    | 1082971 | 287.97    | 35.81   | 1082971 | 292.3     | 32.61   |
| S27    | 1461901 | 283.66    | 40.95   | 1461901 | 289.1     | 38.07   |
| S28    | 878005  | 276.42    | 47.8    | 878005  | 284.28    | 44.93   |
| S29    | 716606  | 242.6     | 66.81   | 716606  | 256.62    | 68.8    |
| S30    | 2780620 | 286.69    | 37.81   | 2780620 | 291.33    | 34.71   |

**Supplementary Figure S1. Microbiota variability. Relative abundance of classified species for each individual.**

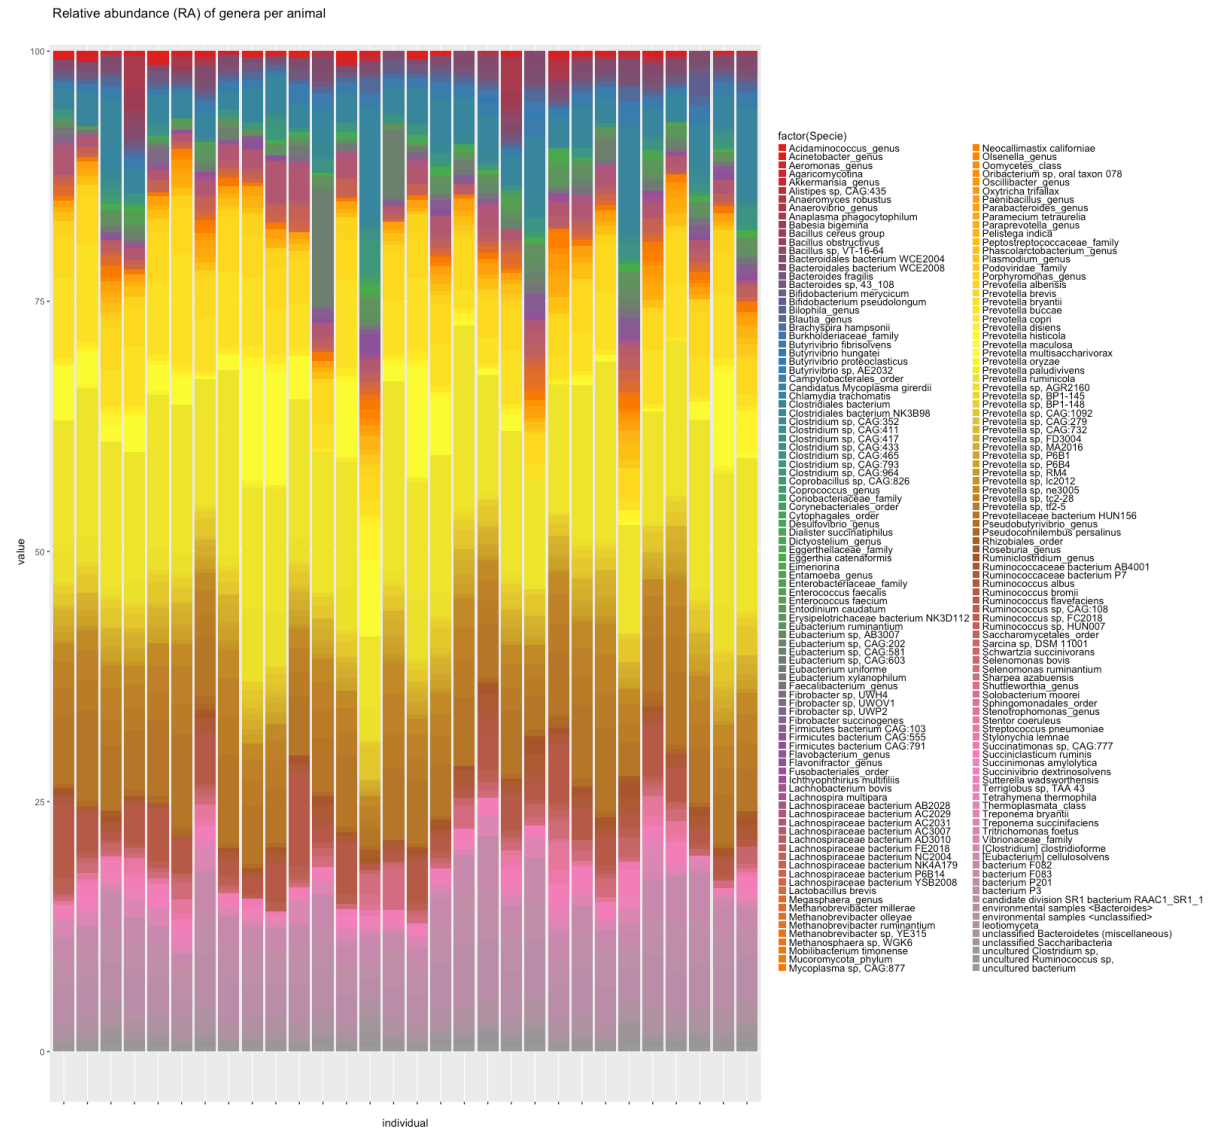

**Supplementary Figure S2. Dry matter intake box plot.** Box plot for dry matter intake within feed efficiency group. Red numbers identify cows in the right-ended cluster in Figure 6b.

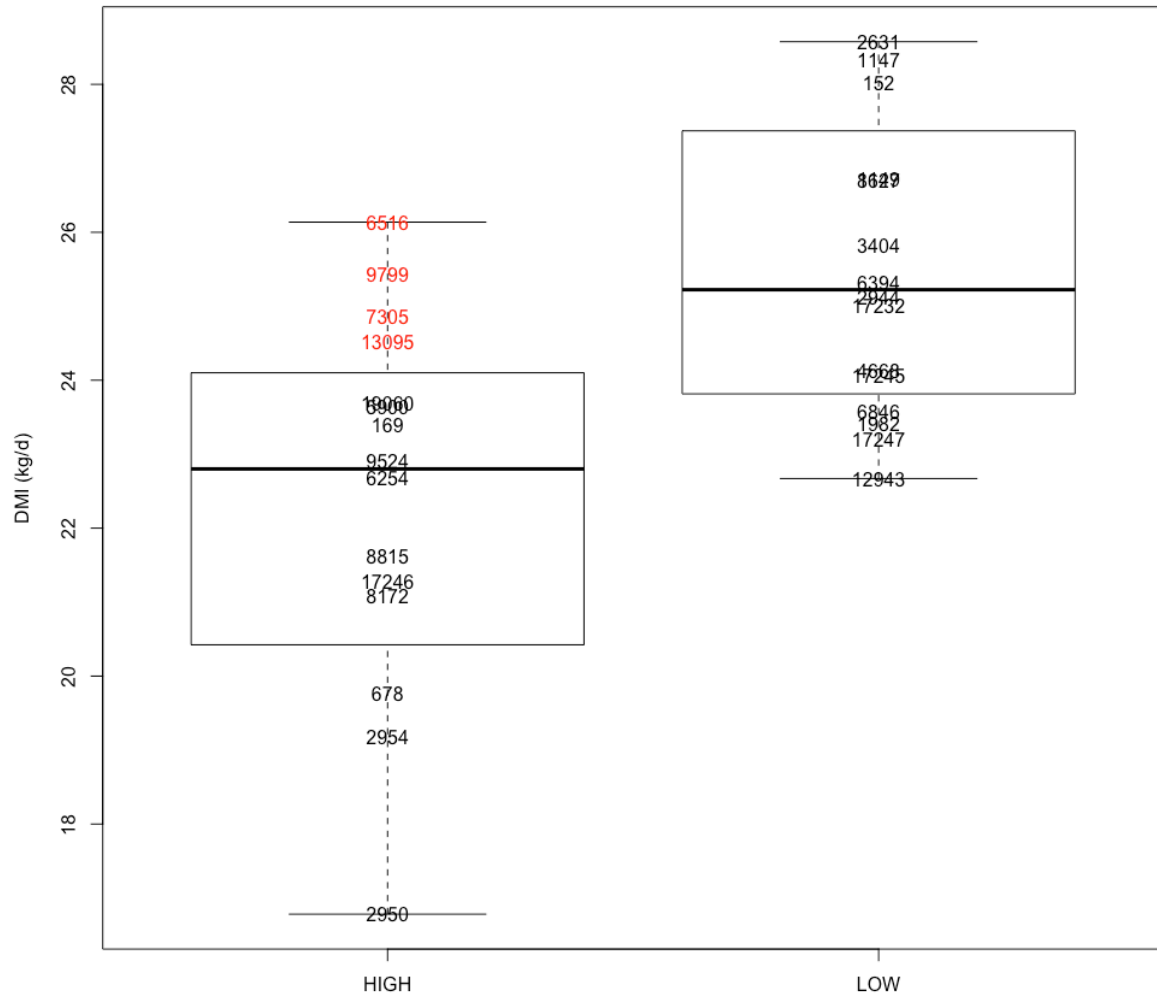

Supplement: 41598_2018_36673_MOESM1_ESM.pdf [file 41598_2018_36673_MOESM1_ESM.pdf]
